# Supplementary material for: Response surface method for polyhydroxybutyrate (PHB) bioplastic accumulation in Bacillus drentensis BP17 using pineapple peel
Source: PubMed Central journal article supplement (PMC7082031; doi:10.1371/journal.pone.0230443), 2020-03-19
Supplement: pone.0230443.s005.pdf [file pone.0230443.s005.pdf]

| Isolates | The most closely related strain                      | Length (bp) | Identity (%) | Intensity of fluorescence | Number of PHAs granules | PHAs content (%) of CDW |
|----------|------------------------------------------------------|-------------|--------------|---------------------------|-------------------------|-------------------------|
| TM3-15   | <i>Shinella fusca</i> DC-196 <sup>T</sup>            | 1,393       | 99.56        | +++                       | 2                       | 5.6                     |
| TM12-4   | <i>Shinella zoogloeoides</i> ATCC 19623 <sup>T</sup> | 1,372       | 99.12        | +++                       | 2-3                     | 18.9                    |
| AG5-2    | <i>Shinella fusca</i> DC-196 <sup>T</sup>            | 1,378       | 99.63        | ++                        | 3-4                     | 18.7                    |
| AG5-3    | <i>Mycoplana dimorpha</i> IAM 13154 <sup>T</sup>     | 1,367       | 99.71        | +++                       | 2-3                     | 12.9                    |
| AG12-1   | <i>Shinella zoogloeoides</i> ATCC 19623 <sup>T</sup> | 1,358       | 99.71        | +++                       | 2                       | 13.5                    |
| BP17     | <i>Bacillus drentensis</i> LMG 21831 <sup>T</sup>    | 1,417       | 99.21        | +++++                     | 4-5                     | 19.9                    |
