# Supplementary material for: Response surface method for polyhydroxybutyrate (PHB) bioplastic accumulation in Bacillus drentensis BP17 using pineapple peel
Source: PubMed Central journal article supplement (PMC7082031; doi:10.1371/journal.pone.0230443), 2020-03-19
Supplement: pone.0230443.s006.pdf [file pone.0230443.s006.pdf]

| Characteristics                     | 1                         | 2                         | 3           | 4                                 | 5                        |
|-------------------------------------|---------------------------|---------------------------|-------------|-----------------------------------|--------------------------|
| Gram stain                          | +                         | +/v                       | +           | -                                 | +                        |
| Cell ends                           | Slightly tapered          | Tapered                   | Rounded     | Rounded/Slightly tapered          | Rounded                  |
| Spore shape                         | Ellipsoidal/Circular      | Ellipsoidal/Circular      | Circular    | Ellipsoidal                       | Ellipsoidal              |
| Spore position                      | Paracentral (Subterminal) | Paracentral (Subterminal) | Subterminal | Central/Paracentral/(subterminal) | Subterminal(Paracentral) |
| Sporangia swollen                   | +                         | +                         | w           | w                                 | w                        |
| Growth at 50 °C                     | -                         | +                         | -           | -                                 | +                        |
| Anaerobic growth                    | +                         | +                         | +           | +                                 | +                        |
| Hydrolysis of gelatin               | -                         | -                         | -           | +                                 | v                        |
| Storage inclusions                  | +                         | +                         | +           | -                                 | -                        |
| ONPG                                | +                         | +                         | +           | v                                 | -                        |
| Urease                              | -                         | -                         | -           | -                                 | -                        |
| Nitrate reduction to N <sub>2</sub> | +                         | v                         | -           | +                                 | +                        |
| Acid production from:               |                           |                           |             |                                   |                          |
| L-arabinose                         | +                         | -                         | -           | -                                 | -                        |
| Amygdalin                           | +                         | v                         | -           | -                                 | v                        |
| D-cellobiose                        | +                         | -                         | -           | -                                 | v                        |
| Glycerol                            | -                         | -                         | -           | -                                 | v                        |
| Glycogen                            | -                         | -                         | -           | +                                 | -                        |
| Lactose                             | +                         | +                         | -           | -                                 | -                        |
| D-mannitol                          | +                         | -                         | -           | +                                 | v                        |
| D-melibiose                         | +                         | +                         | -           | -                                 | -                        |
| Methyl- $\alpha$ -D-glucoside       | -                         | v                         | -           | w                                 | -                        |
| Raffinose                           | +                         | v                         | -           | -                                 | -                        |
| Ribose                              | -                         | v                         | -           | w                                 | v                        |
| Salicin                             | -                         | +                         | -           | -                                 | -                        |
| Starch                              | +                         | v                         | -           | +                                 | -                        |
| Sucrose                             | +                         | v                         | -           | +                                 | -                        |
